# Supplementary material for: The effect of exercise on aerobic capacity in individuals with spinal cord injury: A systematic review with meta-analysis and meta-regression
Source: medRxiv preprint, doi:10.1101/2022.08.05.22278397, version 3 (2023-06-02)
Supplement: S3 Exercise intensity classifications [file 278397_file08.docx]

**Electronic Supplementary Material 3**

**The effect of exercise on aerobic capacity in individuals with spinal cord injury: A systematic review with meta-analysis and meta-regression**

**PLoS Medicine**

Hodgkiss, D.D1, Bhangu, G2,3, Lunny, C4, Jutzeler C.R5,6, Chiou S.Y1,7,8,9 Walter, M2,10, Lucas S.E1,7, Krassioukov, A.V.2,11,12, Nightingale, T.E.1,2,9

**1**School of Sport, Exercise and Rehabilitation Sciences, University of Birmingham, UK.

**2**International Collaboration on Repair Discoveries (ICORD), University of British Columbia, Vancouver, British Columbia, Canada. **3**MD Undergraduate Program, Faculty of Medicine, University of British Columbia, Vancouver, Canada. **4**Knowledge Translation Program, Li Ka Shing Knowledge Institute, St. Michael’s Hospital, Toronto, and the University of British Columbia, Vancouver, British Columbia, Canada.

**5**Department of Health Sciences and Technology, ETH Zurich, Zurich, Switzerland. **6** Schulthess Clinic, Zurich, Switzerland. **7**Centre for Human Brain Health, University of Birmingham, United Kingdom. **8**MRC Versus Arthritis Centre for Musculoskeletal Ageing Research, University of Birmingham, United Kingdom.

**9**Centre for Trauma Science Research, University of Birmingham, United Kingdom. **10** Department of Urology, University Hospital Basel, University of Basel, Basel, Switzerland. **11** Department of Medicine, Division of Physical Medicine and Rehabilitation, University of British Columbia, Vancouver, British Columbia, Canada. **12**GF Strong Rehabilitation Centre, Vancouver Coastal Health, Vancouver, British Columbia, Canada.

**Corresponding author:** Tom E. Nightingale PhD, [T.E.Nightingale@bham.ac.uk](mailto:T.E.Nightingale@bham.ac.uk)

| **Table 1:** Methods of exercise intensity prescription classified into thresholds provided by the ACSM [1]. | | | | | |
| --- | --- | --- | --- | --- | --- |
|  | **%V̇O2peak** | **%HRpeak** | **%V̇O2reserve or %HRR** | **RPE (Borg 6 – 20 scale)** | **%1 RM** |
| Light | 37 – 45 | 57 – 63 | 30 – 39 | 9 – 11 | 30 – 49 |
| Moderate | 46 – 63 | 64 – 76 | 40 – 59 | 12 – 13 | 50 – 69 |
| Vigorous | 64 – 90 | 77 – 95 | 60 – 89 | 14 – 17 | 70 – 84 |
| Supramaximal | ≥91 | ≥96 | ≥90 | ≥18 | ≥85 |
| RPE assessed via the Borg (6 – 20 scale) [2]. %1 RM, percentage of one repetition maximum; ACSM, American College of Sports Medicine; %HRpeak, percentage of peak heart rate; %HRR, percentage of heart rate reserve; RPE, rating of perceived exertion; %V̇O2peak, percentage of peak oxygen uptake; %V̇O2reserve, percentage of oxygen uptake reserve. | | | | | |

**References**

1. American College of Sports Medicine. *ACSM’s guidelines for exercise testing and prescription.* 10th edn. Baltimore, MD: Lippincott Williams and Wilkins, 2017.
2. Borg GA. Physical performance and perceived exertion. *Med Sci Sports Exerc* 1982;14:377-381.
