# Supplementary material for: The effect of exercise on aerobic capacity in individuals with spinal cord injury: A systematic review with meta-analysis and meta-regression
Source: medRxiv preprint, doi:10.1101/2022.08.05.22278397, version 3 (2023-06-02)
Supplement: S4 Correlation factors [file 278397_file09.docx]

**Electronic Supplementary Material 4**

**The effect of exercise on aerobic capacity in individuals with spinal cord injury: A systematic review with meta-analysis and meta-regression**

**PLoS Medicine**

Hodgkiss, D.D1, Bhangu, G2,3, Lunny, C4, Jutzeler C.R5,6, Chiou S.Y1,7,8,9 Walter, M2,10, Lucas S.E1,7, Krassioukov, A.V.2,11,12, Nightingale, T.E.1,2,9

**1**School of Sport, Exercise and Rehabilitation Sciences, University of Birmingham, UK.

**2**International Collaboration on Repair Discoveries (ICORD), University of British Columbia, Vancouver, British Columbia, Canada. **3**MD Undergraduate Program, Faculty of Medicine, University of British Columbia, Vancouver, Canada. **4**Knowledge Translation Program, Li Ka Shing Knowledge Institute, St. Michael’s Hospital, Toronto, and the University of British Columbia, Vancouver, British Columbia, Canada. **5**Department of Health Sciences and Technology, ETH Zurich, Zurich, Switzerland. **6** Schulthess Clinic, Zurich, Switzerland. **7**Centre for Human Brain Health, University of Birmingham, United Kingdom. **8**MRC Versus Arthritis Centre for Musculoskeletal Ageing Research, University of Birmingham, United Kingdom. **9**Centre for Trauma Science Research, University of Birmingham, United Kingdom. **10** Department of Urology, University Hospital Basel, University of Basel, Basel, Switzerland. **11** Department of Medicine, Division of Physical Medicine and Rehabilitation, University of British Columbia, Vancouver, British Columbia, Canada. **12**GF Strong Rehabilitation Centre, Vancouver Coastal Health, Vancouver, British Columbia, Canada.

**Corresponding author:** Tom E. Nightingale PhD, T.E.Nightingale@bham.ac.uk

| **Table 1.** The correlation coefficients averaged across each study design for each cardiorespiratory fitness outcome. | | | |
| --- | --- | --- | --- |
|  | **AV̇O2peak** | **RV̇O2peak** | **PPO** |
| Observational studies | 0.87 | 0.92 | 0.92 |
| RCT controls | 0.98 | 0.99 | 0.99 |
| RCT exercise interventions | 0.97 | 0.96 | 0.95 |
| Combined pre-post and RCT exercise interventions | 0.87 | 0.92 | 0.95 |

AV̇O2peak, absolute peak oxygen consumption; PPO, peak power output; RCT, randomised-controlled trial; RV̇O2peak, relative peak oxygen consumption.
