# Supplementary material for: The effect of exercise on aerobic capacity in individuals with spinal cord injury: A systematic review with meta-analysis and meta-regression
Source: medRxiv preprint, doi:10.1101/2022.08.05.22278397, version 3 (2023-06-02)
Supplement: S10 Gait training sub-analysis [file 278397_file15.docx]

**Electronic Supplementary Material 10**

**The effect of exercise on aerobic capacity in individuals with spinal cord injury: A systematic review with meta-analysis and meta-regression**

**PLoS Medicine**

Hodgkiss, D.D1, Bhangu, G2,3, Lunny, C4, Jutzeler C.R5,6, Chiou S.Y1,7,8,9 Walter, M2,10, Lucas S.E1,7, Krassioukov, A.V.2,11,12, Nightingale, T.E.1,2,9

**1**School of Sport, Exercise and Rehabilitation Sciences, University of Birmingham, UK.

**2**International Collaboration on Repair Discoveries (ICORD), University of British Columbia, Vancouver, British Columbia, Canada. **3**MD Undergraduate Program, Faculty of Medicine, University of British Columbia, Vancouver, Canada. **4**Knowledge Translation Program, Li Ka Shing Knowledge Institute, St. Michael’s Hospital, Toronto, and the University of British Columbia, Vancouver, British Columbia, Canada.

**5**Department of Health Sciences and Technology, ETH Zurich, Zurich, Switzerland. **6** Schulthess Clinic, Zurich, Switzerland. **7**Centre for Human Brain Health, University of Birmingham, United Kingdom. **8**MRC Versus Arthritis Centre for Musculoskeletal Ageing Research, University of Birmingham, United Kingdom.

**9**Centre for Trauma Science Research, University of Birmingham, United Kingdom. **10** Department of Urology, University Hospital Basel, University of Basel, Basel, Switzerland. **11** Department of Medicine, Division of Physical Medicine and Rehabilitation, University of British Columbia, Vancouver, British Columbia, Canada. **12**GF Strong Rehabilitation Centre, Vancouver Coastal Health, Vancouver, British Columbia, Canada.

**Corresponding author:** Tom E. Nightingale PhD, [T.E.Nightingale@bham.ac.uk](mailto:T.E.Nightingale@bham.ac.uk)

***Purpose:*** This supplementary file contains a sub-analysis of gait training cardiopulmonary exercise test (CPET) modalities. The purpose was to compare whether there are any transfer effects between a gait training intervention and upper-body exercise (i.e., arm crank ergometry performance in a CPET).

***Conclusion:*** Although there are no significant subgroup differences between arm-crank ergometry and treadmill performance following a gait training exercise intervention, there are larger pooled effect estimates for absolute and relative peak oxygen consumption in interventions using a treadmill CPET.

**Figure 1:** Forest plot of absolute peak oxygen consumption with gait training interventions grouped into subgroups by cardiopulmonary exercise test (CPET) modality. Subgroup difference p-value was adjusted for multiple comparisons; statistically significant at *p*<0.025.

**Figure 2:** Forest plot of relative peak oxygen consumption with gait training interventions grouped into subgroups by cardiopulmonary exercise test (CPET) modality. Subgroup difference p-value was adjusted for multiple comparisons; statistically significant at *p*<0.025.

**Figure 3:** Forest plot of peak power output with gait training interventions using arm-crank ergometry (ACE) cardiopulmonary exercise test (CPET). No interventions used treadmill CPET.
